# Supplementary material
Source: Springer Nature journal article supplement (https://www.springermedizin.de/resource/supplementary/12985_2007_266_MOESM2_ESM.pdf/9607666)

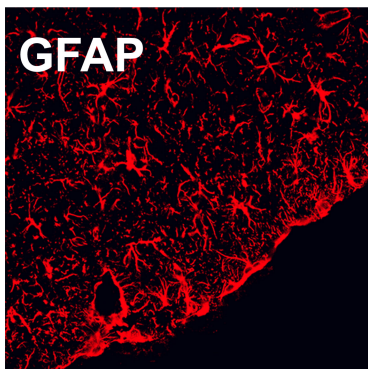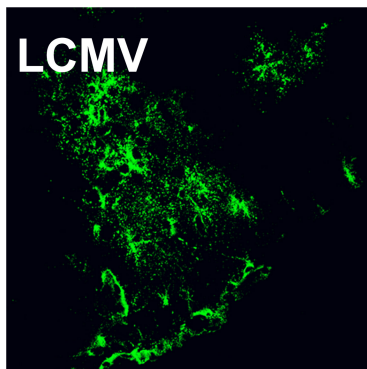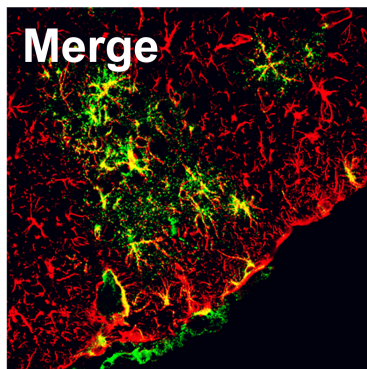

Day  
30

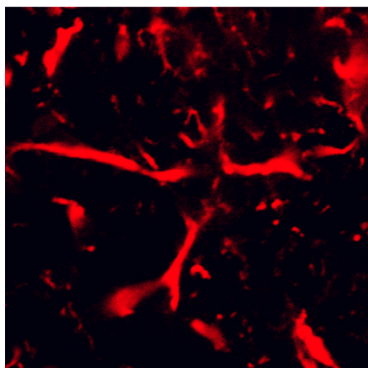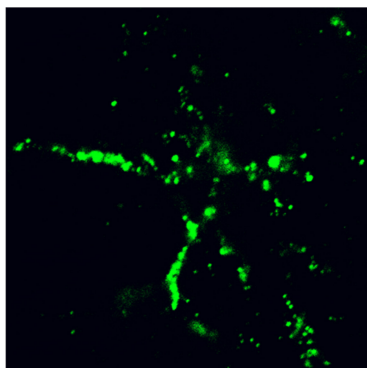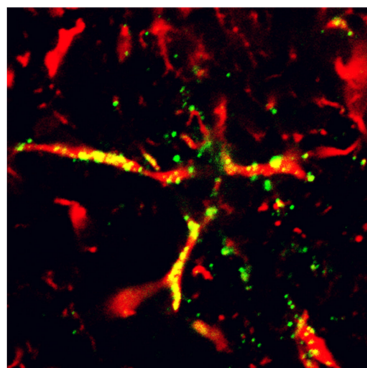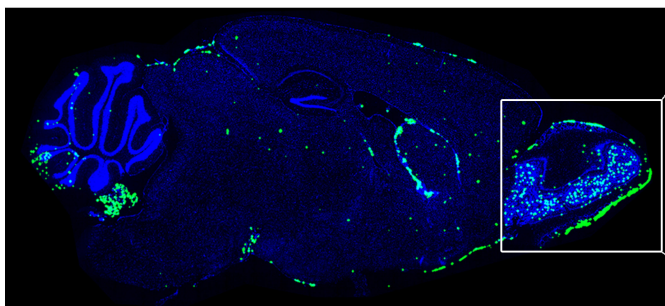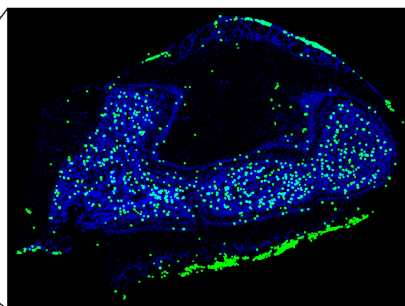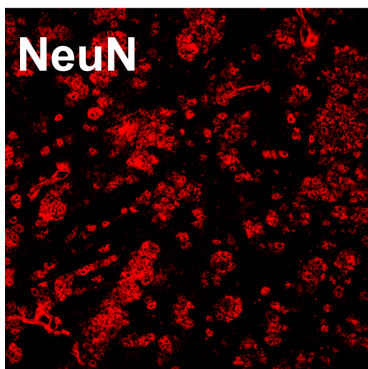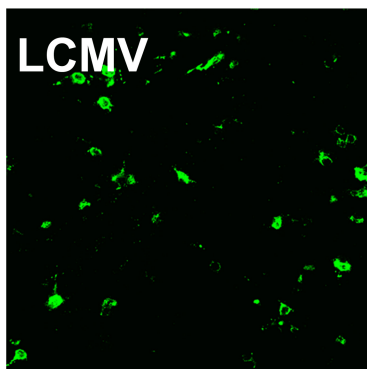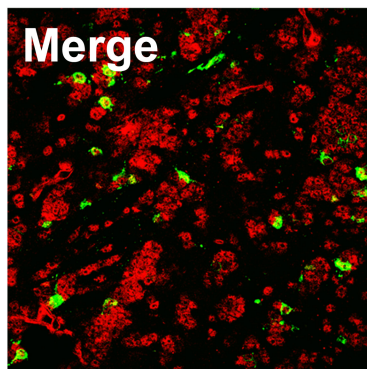

Day  
150

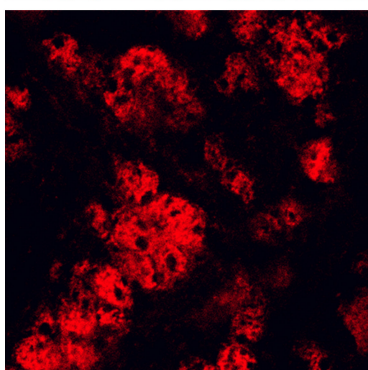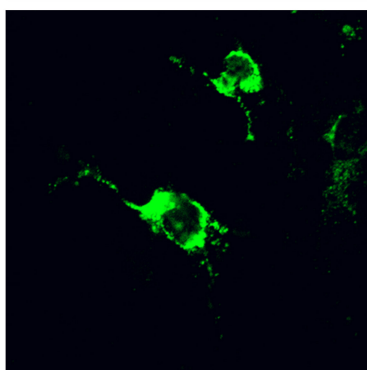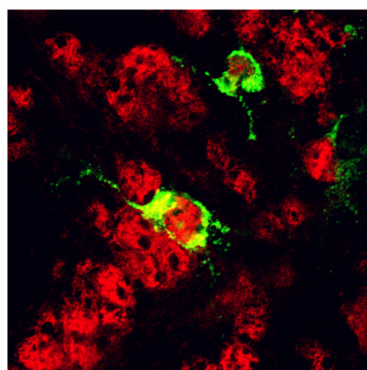

Supplement: MOESM2 [file 9607666]
